# Supplementary material for: Occurrence of Nine Pyrrolizidine Alkaloids in Senecio vulgaris L. Depending on Developmental Stage and Season
Source: PubMed Central journal article supplement (PMC6473320; doi:10.3390/plants8030054), 2019-03-05
Supplement: plants-08-00054-s001.pdf [file plants-08-00054-s001.pdf]

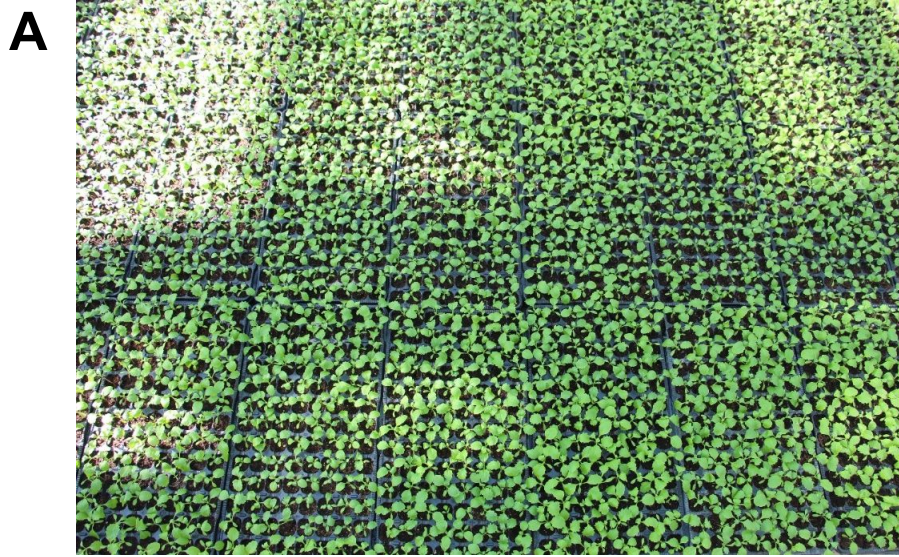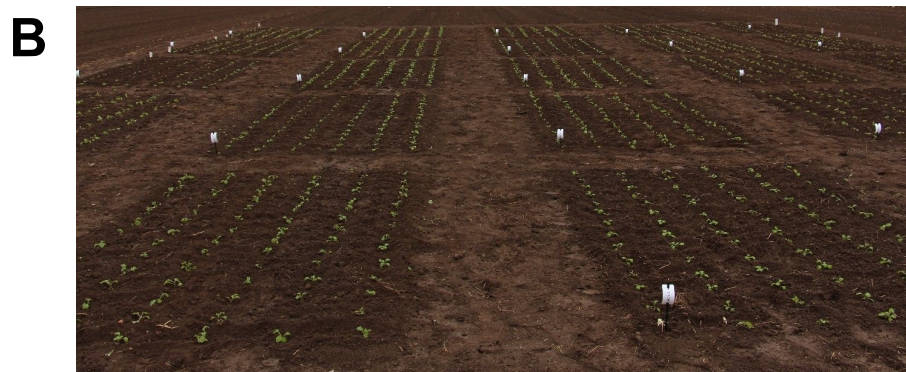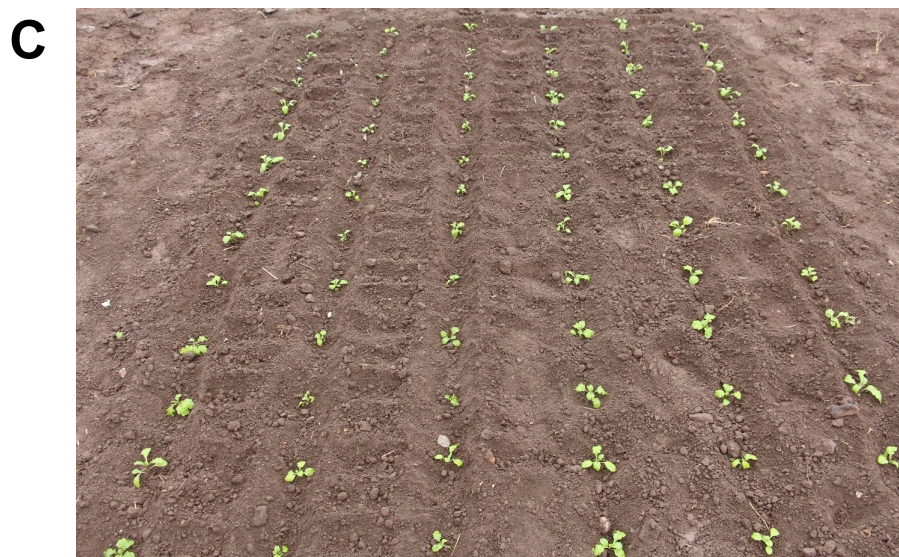

**Supplemental Figure S1.** A: Plants of *Senecio vulgaris* L. during cultivation in greenhouse for experimental part “autumn” in TEKU®-palettes (Pöppelmann, Lohne, Germany) for 104 plants per pallet, with a size of 55 x 28 x 3.8 cm and a volume of 21 mL per pot (16 August, 2016); B: Plants of *Senecio vulgaris* L. totally planted out for experimental part “spring”: 25 field plots scaling 5.54 m<sup>2</sup> each (30 March, 2016); C: Plants of *Senecio vulgaris* L. planted out for experimental part “spring”, one plot with a scale of 2.8 x 1.98 m (30 March, 2016).

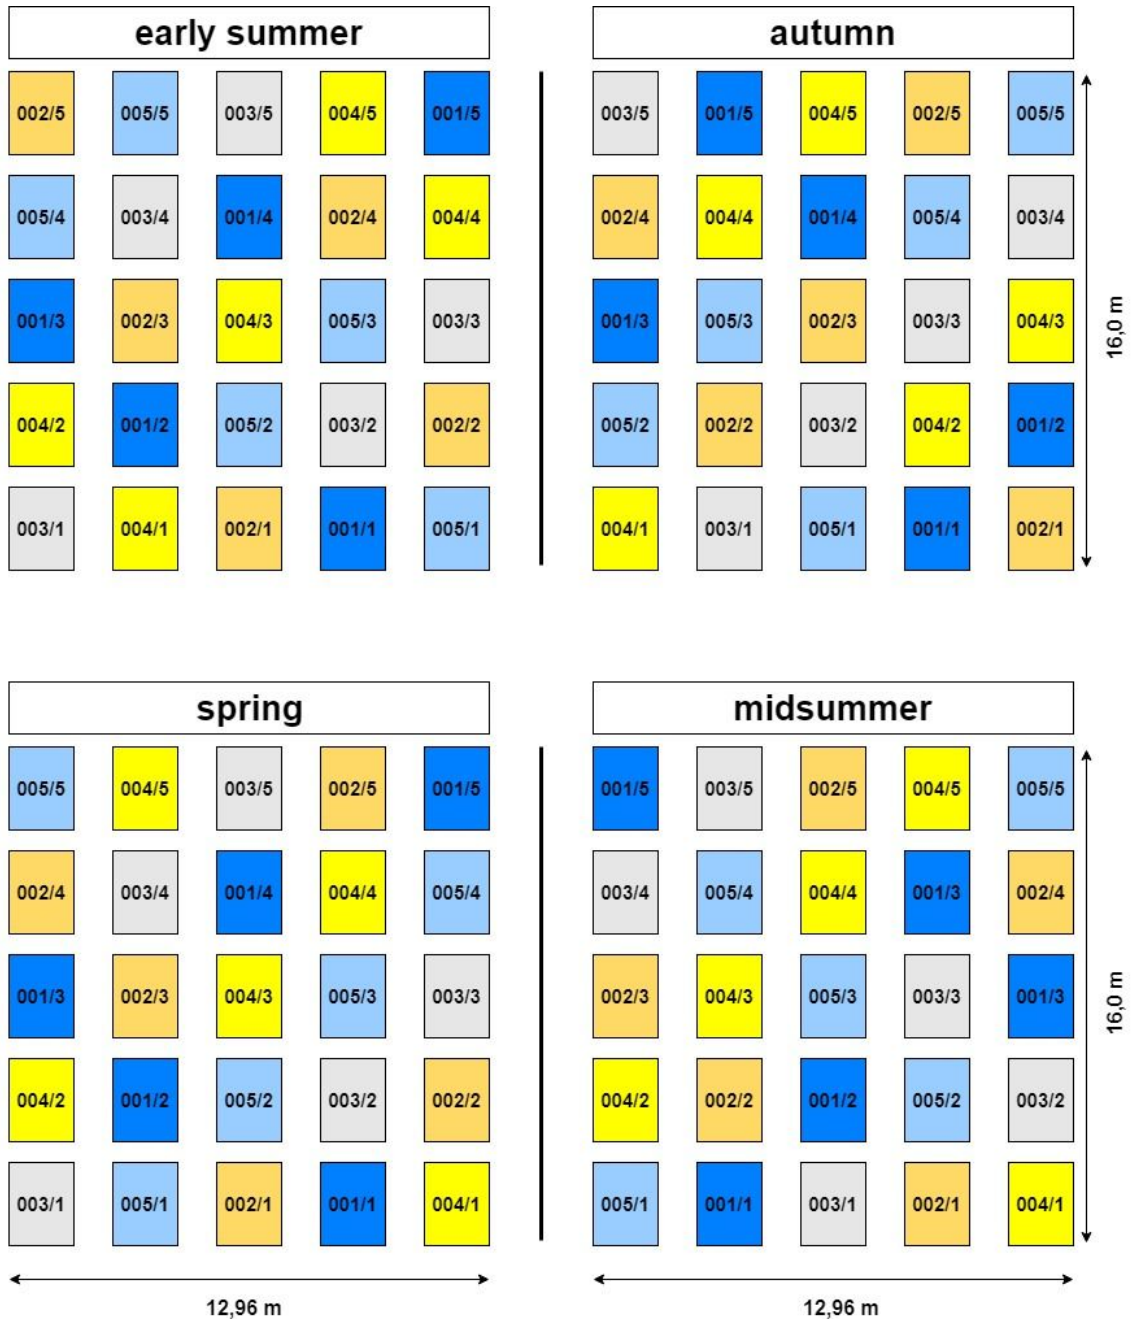

**Supplemental Figure S2.** Schematic representation of the complete experimental design as Latin squares for the effect stage for each sub trial, in a general linear model with:  $y_{ijk} = \mu + \alpha_i + c_j + r_k + e_{ijk}$  ( $\mu$ =mean;  $\alpha$ =stage;  $c$ =column,  $r$ =row). First number represents the developmental stage, second number the replicate number. For example: 004/3 represents the 3<sup>rd</sup> replicate to investigate developmental stage 4 of the distinct season.



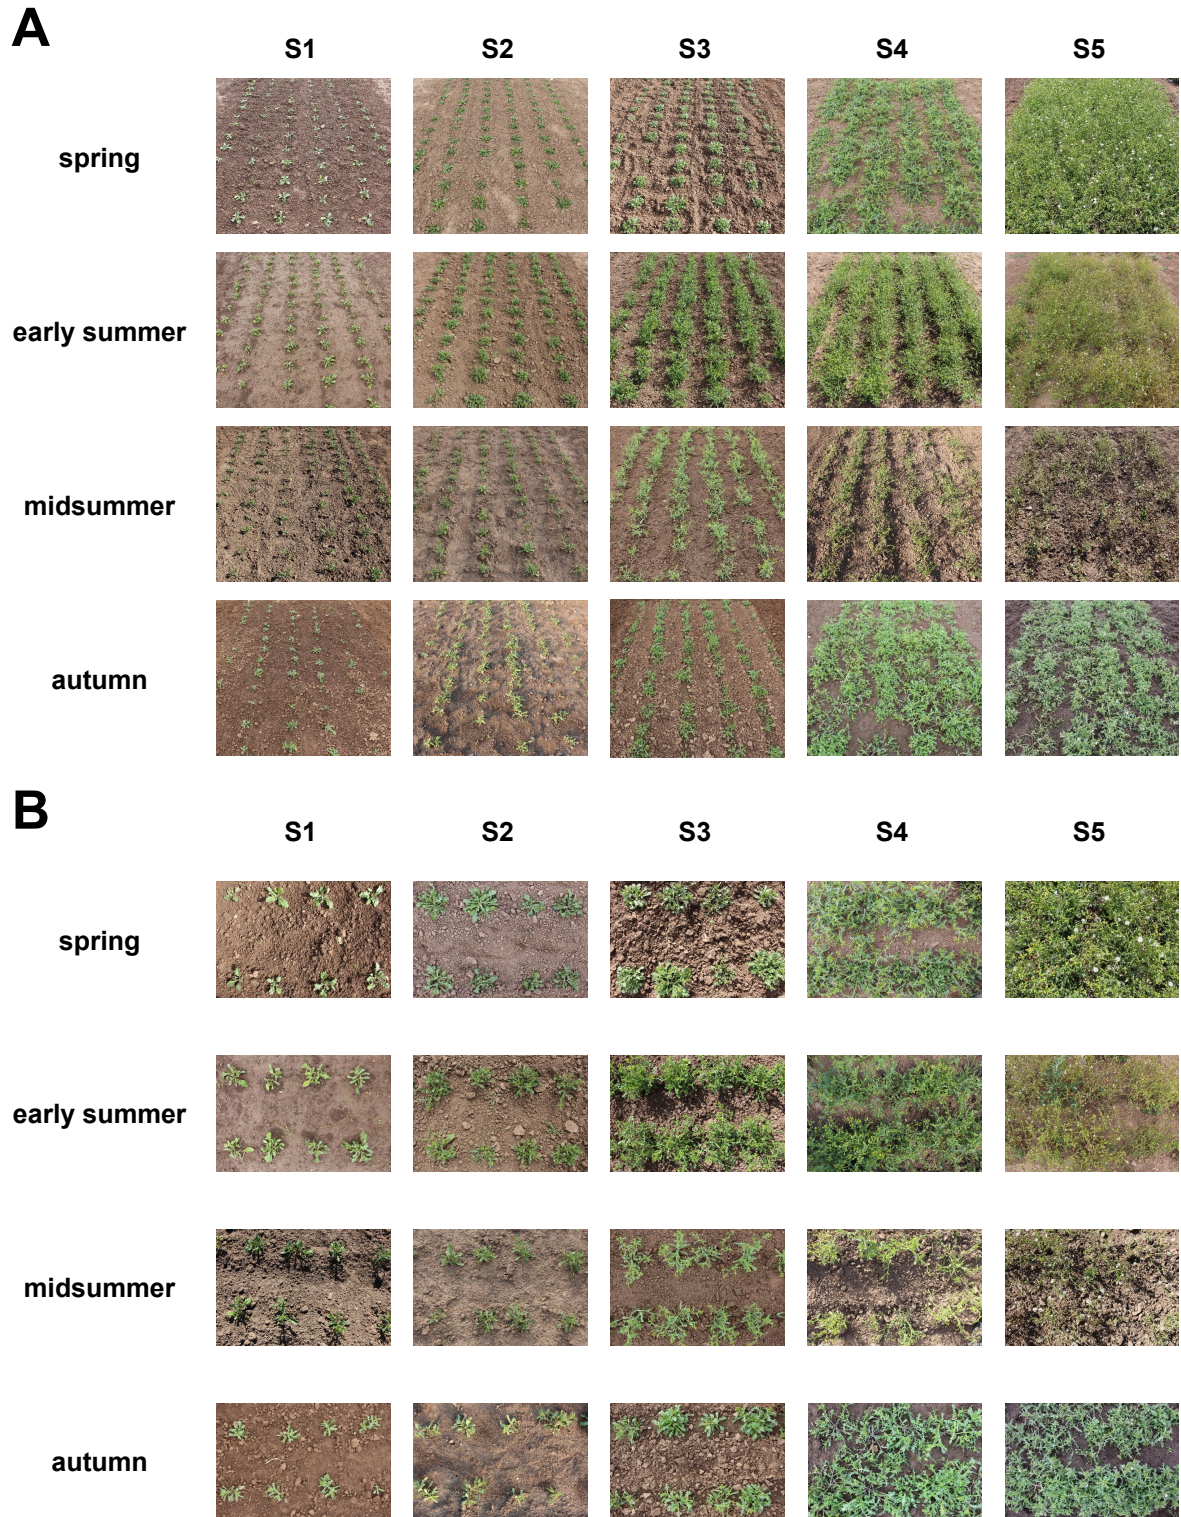

Supplemental Figure S3. A: Field plots of *Senecio vulgaris* L. before sampling, representative pictures; B: Plants of *Senecio vulgaris* L. before sampling, representative pictures.

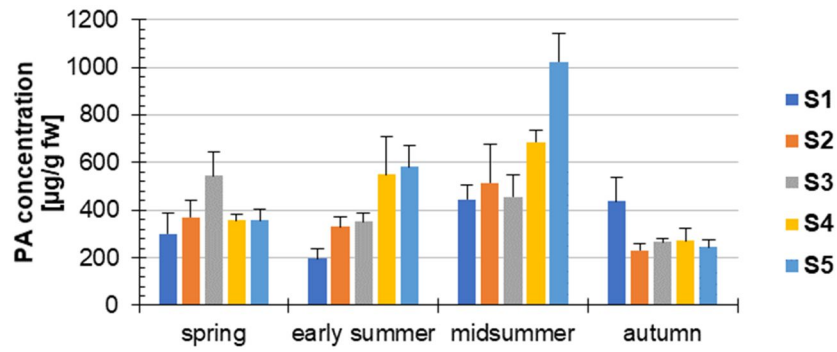

**Supplemental Figure S4.** Total PA concentration ( $\mu\text{g/g}$ ) of nine different PAs in *Senecio vulgaris* L. plants (fresh weight) depending on the developmental stage (S1 to S5) and season. Results are means  $\pm$  SD of five different determinations (distinct sub trials, see Supplemental Figure S2 and S3).

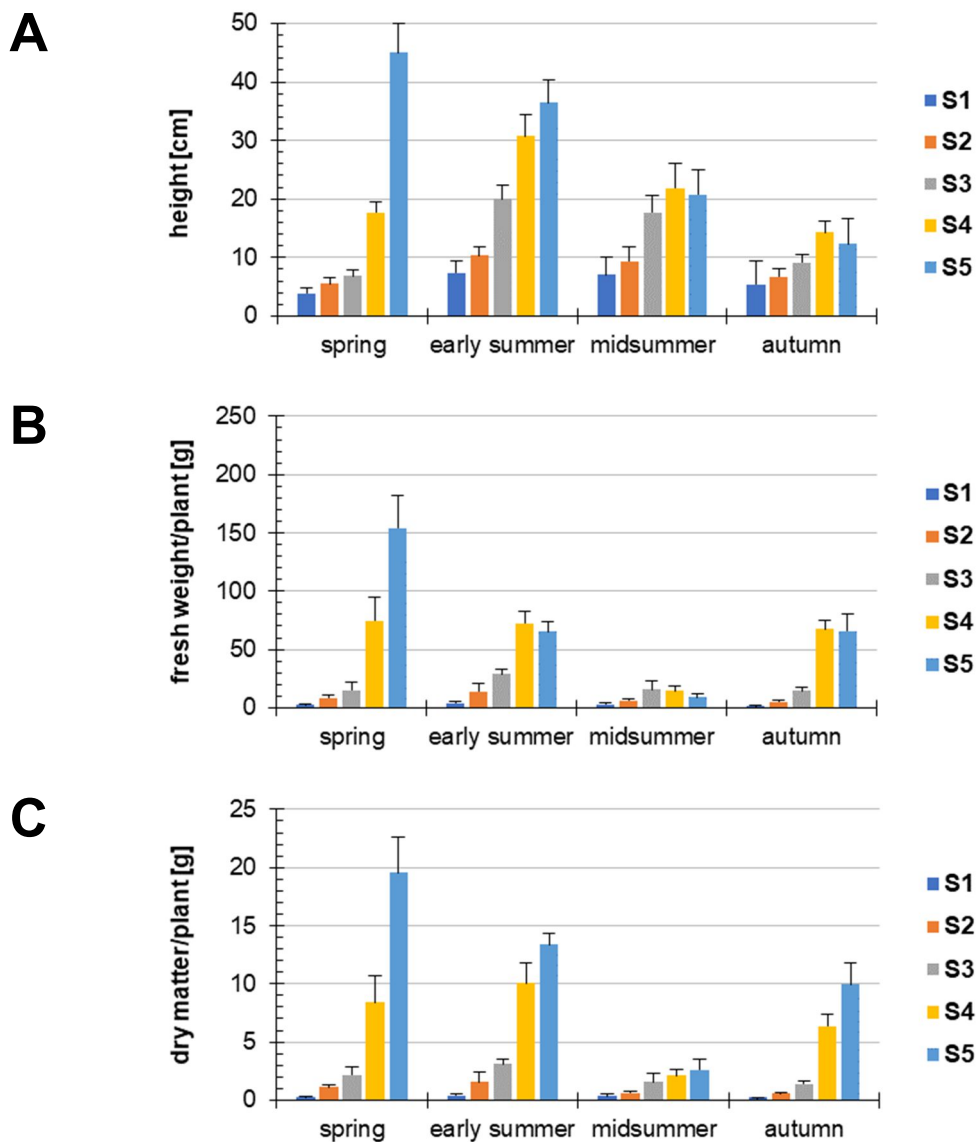

**Supplemental Figure S5.** A: Average height (cm) of *Senecio vulgaris* L. plants depending on the developmental stage (S1 to S5) and season. B: Average fresh weight (g) of *Senecio vulgaris* L. plants depending on the developmental stage (S1 to S5) and season. C: Average dry matter (g) of *Senecio vulgaris* L. plants depending on the developmental stage (S1 to S5) and season. Results are means  $\pm$  SD of five different determinations (distinct sub trials, see Supplemental Figure S2 and S3).

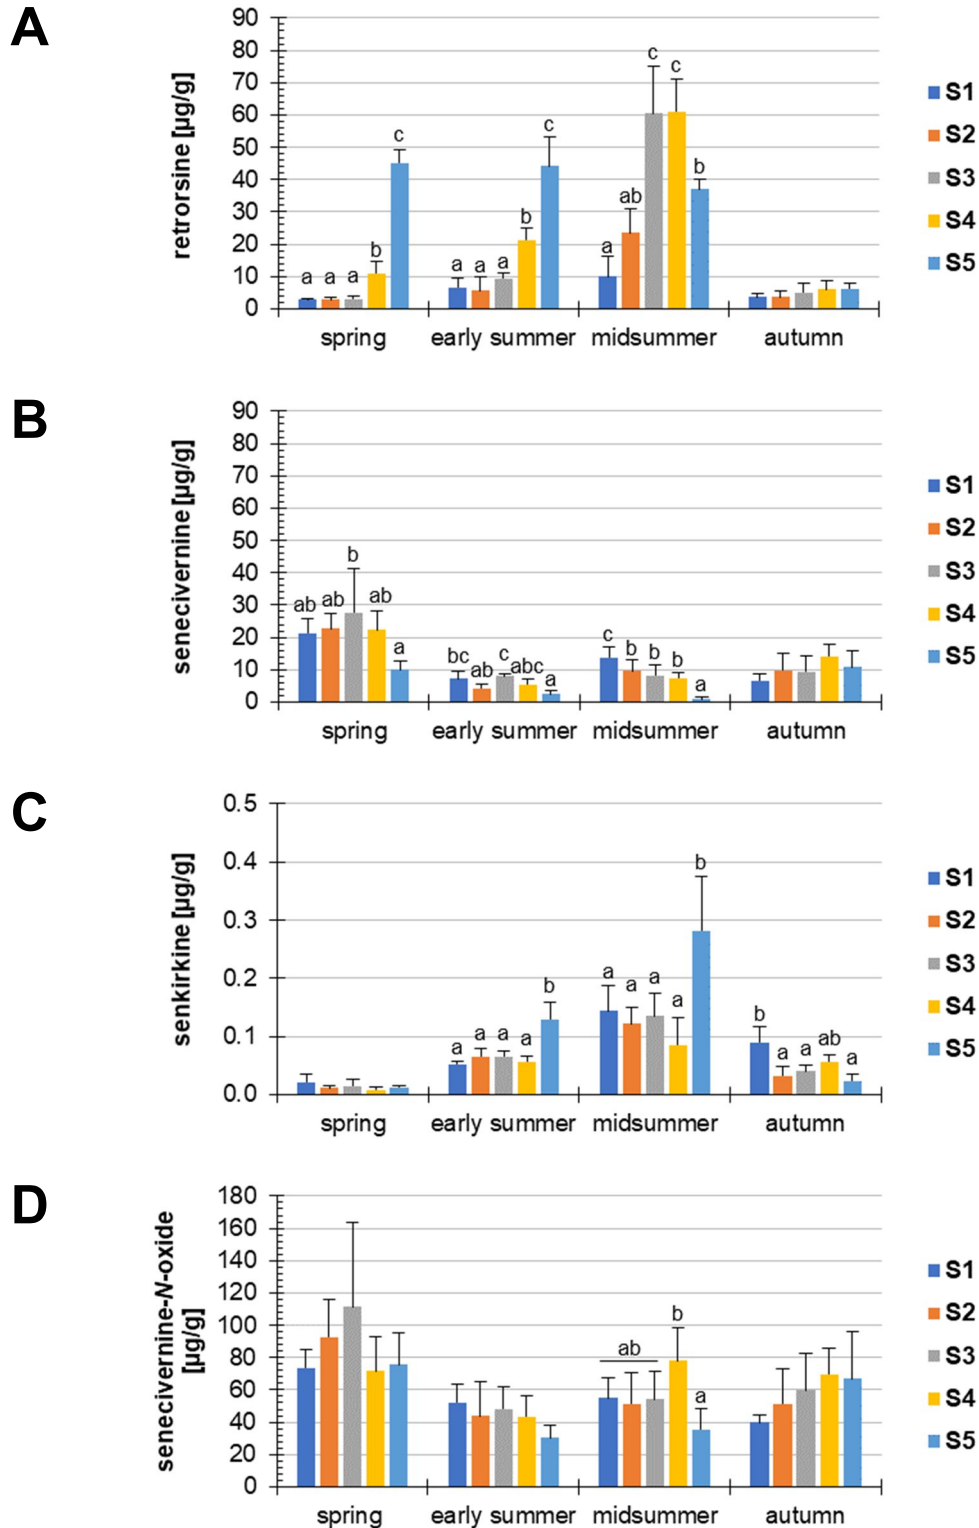

**Supplemental Figure S6.** PA concentration ( $\mu\text{g/g}$ ) of A: retrorsine; B: senecivernine; C: senkirkine; D: senecivernine-N-oxide in *Senecio vulgaris* L. plants (dry mass) depending on the developmental stage (S1 to S5) and season. Results are means  $\pm$  SD of five different determinations (distinct areas, see Supplemental Figure S2). Different letters identify significant differences ( $p < 0.05$ ) between developmental stages (ANOVA, Tukey's honest significance difference).
